# Supplementary material for: Robust Visual Correlation Tracking
Source: Hindawi journal article supplement (doi:10.1155/2015/238971), 2015-01-01
Supplement: f1 [file 238971.f1.zip]

Archive with 14 entries (13 files):
- Tracking Results videos/
- Tracking Results videos/car4_results.avi
- Tracking Results videos/cardark_results.avi
- Tracking Results videos/carscale_results.avi
- Tracking Results videos/david_results.avi
- Tracking Results videos/dog1_results.avi
- Tracking Results videos/faceocc1_results.avi
- Tracking Results videos/girl_results.avi
- Tracking Results videos/Read me.txt
- Tracking Results videos/singer1_results.avi
- Tracking Results videos/skating1_results.avi
- Tracking Results videos/tiger1_results.avi
- Tracking Results videos/trellis_results.avi
- Tracking Results videos/woman_results.avi
