# Supplementary material for: Robust Visual Correlation Tracking
Source: Hindawi journal article supplement (doi:10.1155/2015/238971), 2015-01-01
Supplement: f1 [file 238971.f1.zip › Tracking Results videos/Read me.txt]

This folder contains the tracking results of 6 trackers on 12 sequences, the detail is decribed in the paper.
